# Supplementary material for: The Ykt6–Snap29–Syx13 SNARE complex promotes crinophagy via secretory granule fusion with Lamp1 carrier vesicles
Source: Sci Rep. 2024 Feb 8;14:3200. doi: 10.1038/s41598-024-53607-x (PMC10853563; doi:10.1038/s41598-024-53607-x)
Supplement: Supplementary file 2 — Supplementary Table S1. [file 41598_2024_53607_MOESM2_ESM.xlsx]

## Sheet: Title of Table S1
Supplementary Table S1. Source data for the statistics presented on Figures

## Sheet: Figure 1.
Fig. 1a-d	overlap between red and green channels
	Pearson's correlation coefficients
larvae	control	ykt6 RNAi/1	ykt6 RNAi/2		Statistical analysis	comparison	p-value	summary
#1	-0.01	0.35	0.6		Ordinary one-way ANOVA with Tukey's post-hoc test	control vs. ykt6 RNAi/1	<0.0001	****
	0.13	0.48	0.33
	0.25	0.36	0.67			control vs. ykt6 RNAi/2	0.0045	**
	0.05	0.24	0.57
	-0.35	0.39	0.54			ykt6 RNAi/2 vs. ykt6 RNAi/1	0.3657	ns
#2	-0.13	0.51	0.57
	0.12	0.6	0.4
	0.59	0.52	0.6
	-0.23	0.61	0.31
	-0.05	0.07	0.47
#3	0.14	0.29	0.23
	0.1	0.49	0.3
	0.22	0.42	0.12
	0.26	0.37	0.09
	0.24	0.4	-0.22
#4	0.26	0.24	0.41
	0.01	-0.06	0.16
	0.21	-0.03	0.61
	0.09	0.22	0.34
	-0.04	-0.39	0.35
#5	0.64	0.05	0.19
	0.34	-0.02	0.2
	0.39	0.06	0.3
	0.48	0.23	0.42
	0.4	0.21	0.36
#6	0.12	0.67	0.29
	0.19	0.54	0.38
	0.27	0.38	0.12
	0.29	0.02	0.24
	0.32	0.46	0.27
#7	0.1	0.36	0.70
	0.35	0.31	0.71
	0.13	0.45	0.33
	0.37	0.2	0.48
	0.28	0.14	0.26
#8	-0.08	0.49	0.58
	-0.09	0.37	0.47
	-0.08	0.63	0.24
	0.08	0.64	0.80
	0.03	0.3	0.38

## Sheet: Figure 2.
Fig. 2a-d	LTR dot size
	area (µm2)
10 randomly selected dots from 5 cells of 5 different larvae	control	ykt6 RNAi	control	vamp7 RNAi		temperature shifted (18°C>29°C)		Statistical analysis	comparison	p-value	summary
	4.667	18.778	9.444	4		room temperature (25°C)		Mann-Whitney U-test	control vs. ykt6 RNAi	0.7810	ns
	6	18.444	5.333	17.222
	67.778	8	35.333	7.444				Mann-Whitney U-test	control vs. vamp7 RNAi	<0.0001	****
	16.556	47.111	14.667	3.333
	28.111	87	3.889	24.889
	42.444	3	22.778	16.667
	33.556	33.889	3.333	7.667
	4.222	5	4.111	5.889
	7.222	21.333	7.111	4.222
	22	13.333	6.889	3.667
	25.667	46.667	56.222	3.111
	13.444	18.889	18.444	5.667
	20.556	98	49.667	3.667
	8	12.889	8.556	3.667
	8	24.889	31.556	9.111
	33.222	4.444	51.333	15
	66.222	3.333	22.222	14.889
	18.556	18.667	57.444	10.778
	9.333	4.333	43.111	11.889
	7	3.889	10.667	5.889
	4.778	3.333	7.889	7
	4.111	6.778	5.556	6.444
	23.333	18.111	21	6.889
	61.333	3.667	9.111	7.444
	87.111	7.111	6.444	13.111
	12.556	42.444	15.333	6
	4.667	4.333	9.889	12.444
	5	20.444	6.667	13.111
	3.556	15.889	25.8	4.222
	17.444	42.889	28.017	16.778
	4.889	5.111	36.731	9.222
	43.444	4.444	25.625	3
	7.111	48.778	26.758	5.444
	3	6.333	30.294	3.111
	21.778	3.556	25.774	4
	9.667	14	52.553	7.444
	15.111	3.667	33.39	3
	6.222	10.444	59.702	5
	27.778	5.889	31.507	5.222
	4.556	7.889	42	3.444
	5.556	26.556	35.333	8.444
	3.889	8.222	26.719	3
	68.333	4	29.61	7
	14.222	40.333	60.444	7
	55	7.556	17.778	14.111
	31.333	35	14.778	4.444
	6.111	58.778	20.889	3.222
	7.556	14.333	22.222	81.556
	31.222	3.667	7.111	4.778
	32.444	16.444	9.667	20.556
	8.333	4.444	5	3.333
	5.889	5.333	4.333	22.556
	10.222	27.333	4.444	7
	4.778	43.222	9.111	5.667
	75.333	8.333	4.778	3.556
	59.444	91.222	3.556	6.778
	29.222	31.556	4.778	8.333
	34.222	71	15.333	6.444
	50.111	9.667	6.222	3.444
	44.667	3.333	8.778	3.556
	4.667	30	4.556	11.667
	61.222	7.111	7.889	5
	26.667	14	3.333	5
	9	28.889	5.667	11.778
	92	38.778	6	11.556
	4.222	61.222	5.444	3
	5	4.667	3.333	18
	7.333	14.444	11	3.444
	9.778	4.556	12.556	3.444
	7.556	17.778	25	3.444
	5.889	3.889	7.111	5.778
	17	10.889	4.111	5.222
	13.556	55.111	4.778	6.778
	27.333	13.889	4.111	5.222
	4.778	4.222	4.111	3.667
	3.111	7.111	6.222	5.667
	23.778	37.333	6.333	7.444
	4.111	28.333	3.889	5.333
	40.667	6.444	4.778	3.667
	5.667	6.556	23.222	4.333
	5.111	5.556	3	3
	3.889	36.111	37.111	3.667
	5.444	23.111	3.111	4.222
	12.222	49.222	7.444	7.556
	27.444	5.778	37.333	7.444
	8	3.889	22.778	9.444
	3.111	4.222	6.556	6.667
	6.556	3.333	6.889	6.889
	9.889	18.556	3.111	12.556
	24	8.667	9	7
	3.111	9.889	3.556	3.667
	3.556	5.333	3.111	8.222
	40.778	5.111	3	7.333
	4	3.667	6	5.556
	7.444	6.333	12	3.333
	3.778	72.333	6.556	3.556
	59.111	14.778	43.333	6
	26	29.889	7.333	3.222
	90.556	3.889	4.444	3.333
	3.778	9.333	7	8.889
	32.444	28.333	3	3.556
	4.444	6.111	7.333	5.222
	11.222	38.444	96.222	5.889
	3	7.889	61.222	9
	5.444	4.667	33	4.444
	3.889	19.444	21.111	3.333
	17.111	7.667	4.444	6.111
	6.667	3.556	80.111	3.111
	62.889	37.444	3.333	5.222
	4	21.111	3.111	4.444
	4	4.556	7.333	4
	11.778	35.778	53.889	9.444
	13.333	9.778	15.444	4.444
	5.667	7	7.111	3.222
	7.111	11.444	17.111	3.778
	11.889	12.444	24.778	4.889
	3.222	62.111	33.889	5.444
	3.778	4.778	42.778	10.778
	3.778	6.556	12.556	4
	23.667	14.333	17.778	4.778
	4.111	8.111	59	20.556
	3.444	10.778	23.667	3.333
	25.556	9.444	4.222	4.889
	8.889	3.889	3.444	6.111
	4.222	19	5	4.333
	3.111	15.333	17.556	3
	3.778	4.333	20	3.333
	43.111	8.333	4.111	11.222
	4.778	14.444	4.778	3
	17.556	10.222	3.111	3.667
	5.556	4.111	22.333	3.333
	4.778	4.778	7.111	5.222
	4.222	26.556	8.556	3.333
	30.667	7.444	6.333	7.111
	10.222	12.444	13.333	5.333
	6.333	23	10.444	3.556
	7.222	9	49.333	6
	11.889	9.444	36.667	4.889
	7.333	8.333	3.444	4.333
	6.778	7.333	28.111	6.889
	4.778	22.111	3	3.333
	3.222	11.222	6.778	3.778
	58.222	3.444	93.889	4
	18.333	4	3.111	4.667
	4.333	9.333	4.444	3.778
	20.444	3	9	5.333
	47	4.889	4.667	3.222
	62.556	17.333	10.444	4.222
	19	4.222	5.444	3
	17.111	19.889	4.778	7.556
	10.333	19.889	34.111	7.667
	3.444	9.222	38.111	5
	85.556	11.333	4.222	3.333
	3.333	12	9.778	17.556
	12.667	6.333	26.222	27.556
	18.556	5.667	6.889	3.333
	15	6.667	3.667	4.222
	16.333	4.222	4.667	9.889
	4.222	5.889	3.778	8.778
	4.333	3.333	3.444	18.444
	3.667	26.556	38.889	4
	54.111	8.778	3.222	5.889
	91	10.333	3.556	4.444
	3.889	7.778	15.556	7.667
	3.444	9.556	18.333	3.333
	5	42.889	3.556	4
	3.556	4.333	3.667	3.444
	11.778	9.444	11.111	3.111
	18.667	8.667	5.222	3.556
	5.333	30.667	11.222	6.889
	13	3.333	9.111	4.667
	3.111	46.222	3.667	3.333
	18.111	41.889	4.889	4.111
	13.667	19.889	4.556	4.778
	15	20	39.222	22.222
	10.667	25.111	17.778	3.667
	3	4.222	3.222	8.667
	10.667	79.556	7	4.556
	18.444	13	6.778	3.778
	25.222	8.778	3	21.667
	3.778	3.556	3.333	8.111
	3.778	6.222	5.667	6.667
	13.889	68.333	25.889	10.333
	12.667	7.667	32.778	5.556
	39.556	18.667	18.667	9.889
	4.556	8	3.556	4
	22	5.778	15	4
	9.444	3.222	6.222	6.111
	51.889	3.111	24.444	22.111
	3.111	15.778	23.222	3.111
	76.222	13.333	23.778	5.111
	25.667	41.778	4.111	4.667
	5.556	23.889	4.222	5.111
	15.111	8.222	6	11.667
	4.444	3.111	51.222	7
	5.778	24.889	3.333	3
	12.778	11.333	3.333	3
	3.111	37	18.333	6.444
	3.333	3.556	20.556	6.444
	4.333	11.889	17.889	3.667
	12.889	24.222	14.889	4
	95.111	59.889	14.222	6.667
	58.222	3.667	7.333	3
	32	39.444	24.556	5.222
	5.444	3.333	18	5.556
	7.111	26	3.667	4.333
	6.889	7	12.444	16.444
	3.556	6.111	9.556	4
	4.556	15	3.444	7.222
	11	3.333	86.444	6.333
	14.667	3.222	13.556	4.556
	8.556	9.111	3.333	7.222
	26.444	4.667	4.444	4.444
	81	10.889	31.444	9.222
	4.222	5.333	14.556	9.444
	7.889	4	47.556	3.222
	8.667	7.444	25.667	8.111
	6.444	3.889	5.222	3.222
	5.222	9.556	9.778	4
	9.889	4.778	4.778	3.778
	3.111	3.111	19	10.556
	44.111	8	45.889	3.111
	3.556	3.222	27.889	4.889
	25.444	7.222	58.889	4.444
	10.889	5.889	29.667	7
	41.778	12.111	3.667	3.556
	27	3.778	21	3.111
	5.111	9.333	25.333	3.222
	6.333	3.222	11.222	3
	11.889	7.667	20.667	3.111
	5.222	10.778	4.889	4.111
	84	5	77	4.444
	4	6.778	15.778	3.333
	8.222	3.667	32.778	3
	7.333	6.778	6.778	6.889
	4.333	42.111	18.333	3.556
	4.556	82.444	3.667	3.333
	3.667	5.556	34.889	3.444
	36.222	10.556	22	9.778
	20.333	3.111	4.222	3
	11.111	25.667	11.333	5
	3.889	6	10.444	8.667
	29.444	5.778	23.667	3.444
	10.667	6.111	93.111	3.556
	20.889	4.222	50.111	3.222
	5	5	6.222	3.667
	9.778	3.889	7.889	5.111
	59.889	12.111	3.778	4.444
	6.889	4.333	11.333	5.778
	6.222	20.667	3.444	3.556

## Sheet: Figure 3.
Fig. 3a-d	proportion of Arl8 rings around SGs
larvae	control			ykt6 RNAi			control			vamp7 RNAi
	total No. of rings	No. Of rings around SGs	%	total No. of rings	No. Of rings around SGs	%	total No. of rings	No. Of rings around SGs	%	total No. of rings	No. Of rings around SGs	%
#1	66	14	21.2121	47	28	59.5745	44	9	20.4545	48	6	12.5		temperature shifted (18°C>29°C)		Statistical analysis	comparison	p-value	summary
	52	24	46.1538	67	26	38.806	62	15	24.1935	59	6	10.1695		room temperature (25°C)		Unpaired t test	control vs. ykt6 RNAi	0.9171	ns
	66	29	43.9394	59	16	27.1186	64	10	15.625	57	5	8.77193
#2	64	29	45.3125	41	23	56.0976	96	22	22.9167	32	3	9.375				Unpaired t test	control vs. vamp7 RNAi	<0.001	****
	61	32	52.459	42	22	52.381	83	24	28.9157	37	3	8.10811
	48	19	39.5833	51	24	47.0588	48	16	33.3333	29	2	6.89655
#3	37	16	43.2432	70	42	60	55	8	14.5455	57	3	5.26316
	29	18	62.069	50	22	44	45	14	31.1111	34	1	2.94118
	49	23	46.9388	51	20	39.2157	60	11	18.3333	50	2	4
#4	86	37	43.0233	58	34	58.6207	92	31	33.6957	42	4	9.52381
	40	15	37.5	53	32	60.3774	79	12	15.1899	27	3	11.1111
	74	46	62.1622	39	26	66.6667	108	36	33.3333	40	4	10
#5	58	31	53.4483	52	23	44.2308	42	7	16.6667	37	0	0
	80	46	57.5	59	32	54.2373	37	9	24.3243	37	1	2.7027
	65	41	63.0769	33	20	60.6061	41	4	9.7561	25	1	4
n(Arl8 rings)	875			772			956			611
Fig. 3e-h	proportion of dLamp1 rings around SGs
larvae	control			ykt6 RNAi			control			vamp7 RNAi
	total No. of rings	No. Of rings around SGs	%	total No. of rings	No. Of rings around SGs	%	total No. of rings	No. Of rings around SGs	%	total No. of rings	No. Of rings around SGs	%
#1	63	58	92.0635	42	16	38.0952	20	19	95	91	12	13.1868		temperature shifted (18°C>29°C)		Statistical analysis	comparison	p-value	summary
	41	34	82.9268	52	18	34.6154	22	20	90.9091	124	9	7.25806		room temperature (25°C)		Mann-Whitney U test	control vs. ykt6 RNAi	<0.0001	****
	40	30	75	44	12	27.2727	27	22	81.4815	74	2	2.7027
#2	24	21	87.5	38	6	15.7895	57	52	91.2281	108	4	3.7037				Mann-Whitney U test	control vs. vamp7 RNAi	<0.0001	****
	28	22	78.5714	35	7	20	44	38	86.3636	75	2	2.66667
	27	23	85.1852	43	13	30.2326	58	48	82.7586	47	4	8.51064
#3	46	25	54.3478	52	22	42.3077	20	17	85	105	3	2.85714
	52	48	92.3077	40	17	42.5	31	17	54.8387	190	8	4.21053
	31	26	83.871	30	12	40	25	17	68	60	5	8.33333
#4	27	22	81.4815	71	32	45.0704	24	19	79.1667	62	3	4.83871
	32	27	84.375	97	23	23.7113	29	25	86.2069	56	1	1.78571
	19	16	84.2105	44	24	54.5455	46	27	58.6957	56	1	1.78571
#5	25	22	88	50	10	20	42	24	57.1429	47	2	4.25532
	23	18	78.2609	36	9	25	39	23	58.9744	54	2	3.7037
	35	32	91.4286	50	10	20	32	22	68.75	37	1	2.7027
n(dLamp1 rings)	513			724			516			1186

## Sheet: Figure 4.
Fig. 4a-d			proportion of GFP-Myc-2xFYVE rings around SGs (%)
larvae	control			ykt6 RNAi			control			vamp7 RNAi
	total No. of rings	No. Of rings around SGs	%	total No. of rings	No. Of rings around SGs	%	total No. of rings	No. Of rings around SGs	%	total No. of rings	No. Of rings around SGs	%
#1	58	45	77.5862	138	42	30.4348	39	14	35.8974	124	5	4.03226		temperature shifted (18°C>29°C)		Statistical analysis	comparison	p-value	summary
	61	51	83.6066	104	36	34.6154	33	11	33.3333	60	5	8.33333		room temperature (25°C)		Welch's t test	control vs. ykt6 RNAi	<0.0001	****
	75	55	73.3333	103	24	23.301	42	10	23.8095	79	5	6.32911
#2	81	68	83.9506	92	20	21.7391	36	23	63.8889	159	14	8.80503				Unpaired t test	control vs. vamp7 RNAi	<0.0001	****
	89	71	79.7753	98	14	14.2857	35	17	48.5714	102	2	1.96078
	74	53	71.6216	74	16	21.6216	46	19	41.3043	78	10	12.8205
#3	88	73	82.9545	91	13	14.2857	41	14	34.1463	79	5	6.32911
	157	143	91.0828	68	11	16.1765	33	6	18.1818	92	4	4.34783
	63	54	85.7143	47	9	19.1489	24	5	20.8333	66	3	4.54545
#4	62	59	95.1613	92	7	7.6087	44	33	75	30	0	0
	70	65	92.8571	130	8	6.15385	73	43	58.9041	43	2	4.65116
	49	45	91.8367	117	19	16.2393	73	51	69.863	54	1	1.85185
#5	121	104	85.9504	108	25	23.1481	44	15	34.0909	61	1	1.63934
	95	73	76.8421	69	13	18.8406	24	13	54.1667	52	0	0
	62	57	91.9355	77	18	23.3766	19	9	47.3684	75	2	2.66667
n(FYVE rings)	1205			1408			606			1154

## Sheet: Figure 5.
Fig. 5a-c	overlap between lysosomal markers and dYkt6 (%)
larvae	(%)
	control	control	control	control
	Lamp1 rings	Lamp1 dots	Arl8 dots	CathL dots
#1	2.5	27.5	12.5	12.5
#2	7.5	50	7.5	5
#3	2.5	47.5	5	17.5
#4	5	47.5	7.5	2.5
#5	0	25	12.5	7.5
n(lysosomal structures)	200	200	200	200		40 randomly sel. structures/sample
